# Supplementary material
Source: PubMed Central journal article supplement (PMC1914211)
Supplement: plntphys_pp.107.098558_2.pdf [file plntphys_pp.107.098558_2.pdf]

## SUPPLEMENTAL FIGURE LEGENDS

### **Suppl. Fig. 1. Southern blot hybridization with four probes from the *bif2* locus.**

For each of the four duplicate blots, twelve micrograms of genomic DNA was digested with *EcoRI* (lane 1), *Hind III* (lane 2) and *EcoRV* (lane 3) and separated on a 0.8 % agarose gel. Each blot was probed individually with a *bif2* probe, as indicated.

(A) The 5' UTR / NT probe encompasses 115 bp of 5' UTR plus the first 393bp of *bif2*, excluding the kinase domain. (B) The 0.6 kb *Pst I* insitu probe and (C) the 0.7kb *EcoRI* / *Not I* northern probes are indicated in Fig 1D. (D) The full-length probe includes the entire coding region of *bif2*. The blots were hybridized overnight at 68°C in Robbins Hybridization Buffer (250 mM Sodium phosphate, pH 7.4, 1 mM EDTA, 7% SDS), washed at 68°C in 0.2 X SSC, 0.2% SDS and exposed for 2 days at -80°C.
