# Supplementary material
Source: PubMed Central journal article supplement (PMC1914211)

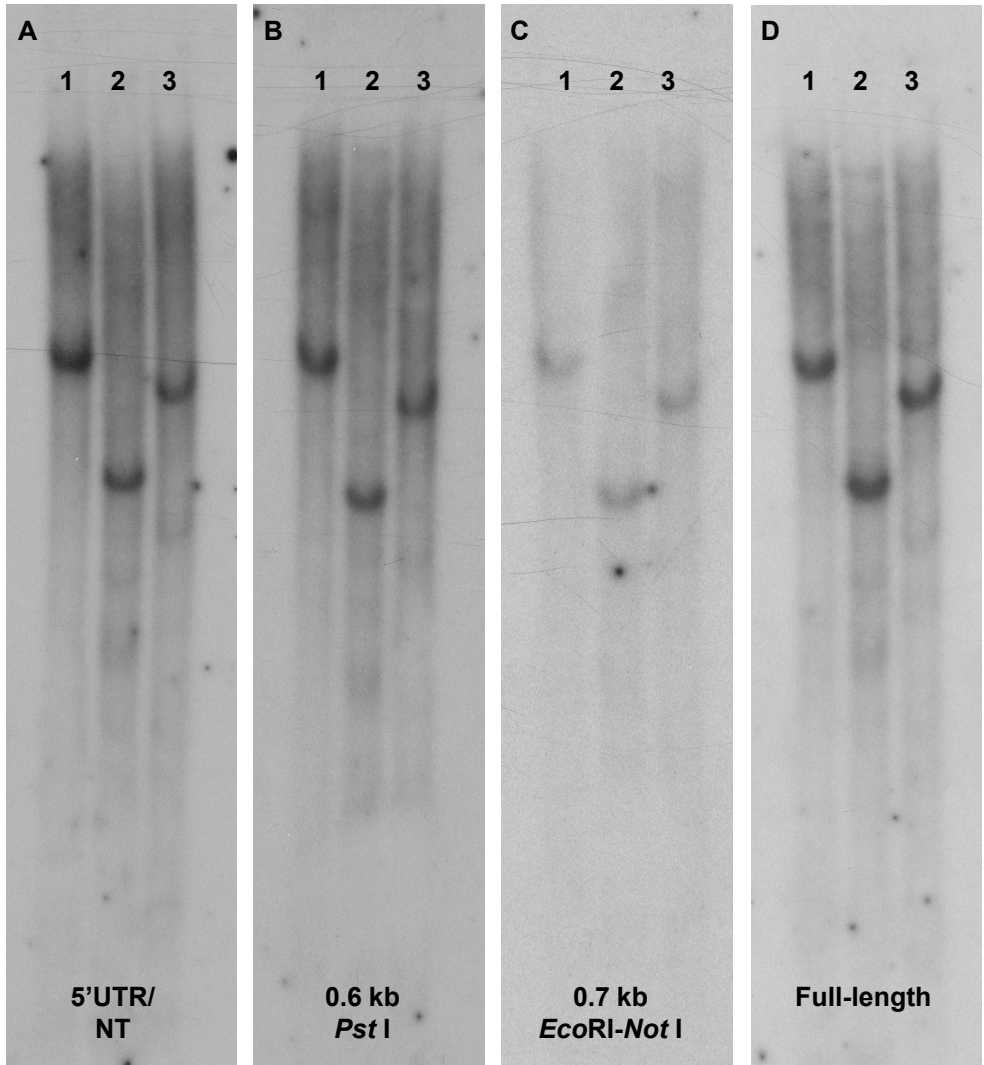

Supplement: plntphys_pp.107.098558_1.pdf [file plntphys_pp.107.098558_1.pdf]
